# Supplementary material for: Crosstalk between SET7/9-dependent methylation and ARTD1-mediated ADP-ribosylation of histone H1.4
Source: PubMed Central journal article supplement (PMC3554541; doi:10.1186/1756-8935-6-1), 2013-01-05

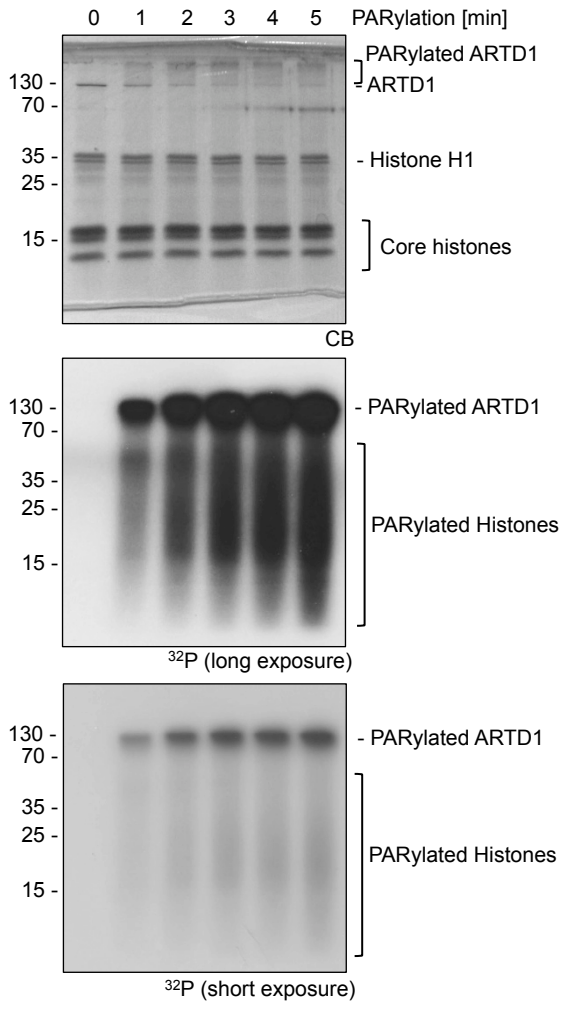

Supplement: 1756-8935-6-1-S1.pdf [file 1756-8935-6-1-S1.pdf]
