# Supplementary material for: Crosstalk between SET7/9-dependent methylation and ARTD1-mediated ADP-ribosylation of histone H1.4
Source: PubMed Central journal article supplement (PMC3554541; doi:10.1186/1756-8935-6-1), 2013-01-05

**A**

GST-Linker-<sub>114</sub>GEAKPKAKKAGAAKAKKPKAGAAKKPKKATGA<sub>144</sub>

GST-Linker-<sub>145</sub>ATPKKSAKKTTPKKAKKPPAAAAGAKKAKKSPKKAKAAKPKKAPKSPA<sub>189</sub>

C1

C2

C3

C4

GST-Linker-<sub>190</sub>KAKAVKPKAAKPKKTAKPKAAKPKKAAAKKK<sub>219</sub>

C5

C6

C7

**B**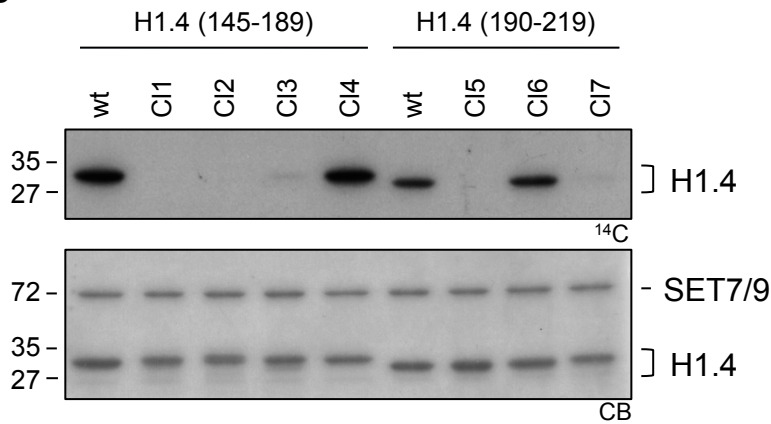**C**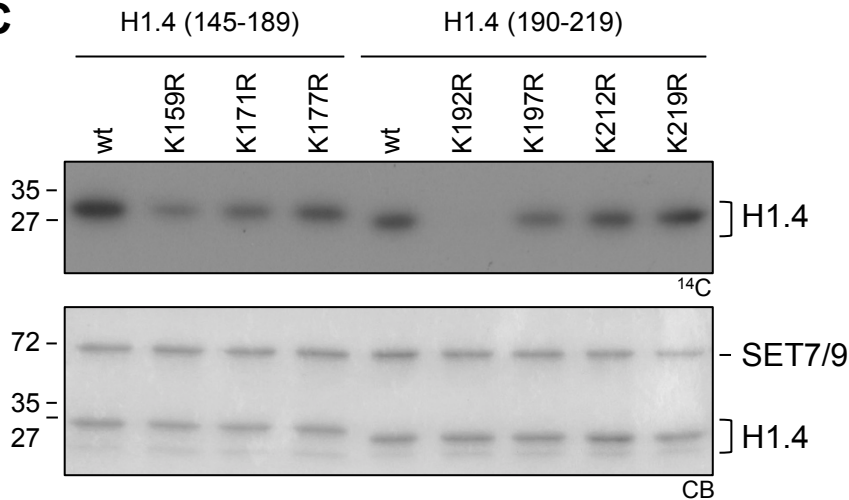**D**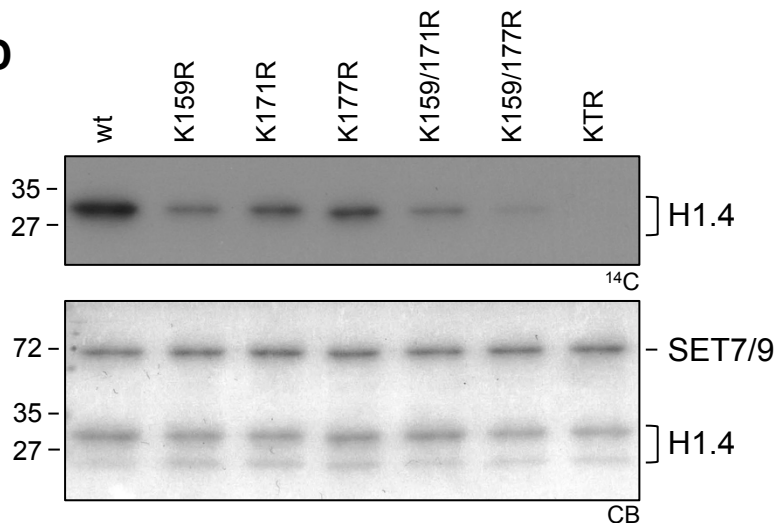

Supplement: 1756-8935-6-1-S2.pdf [file 1756-8935-6-1-S2.pdf]
